# Supplementary material
Source: PubMed Central journal article supplement (PMC2759394)
Supplement: NIHMS105370-supplement-1.pdf [file NIHMS105370-supplement-1.pdf]

SUPPLEMENTAL TABLE.

| CSF biomarker                                | Age    |         |    | Education |         |    | CDR-SB |         |    | Psychometric composite |         |    |
|----------------------------------------------|--------|---------|----|-----------|---------|----|--------|---------|----|------------------------|---------|----|
|                                              | r      | P-value | N  | r         | P-value | N  | r      | P-value | N  | r                      | P-value | N  |
| tau                                          | -0.050 | 0.735   | 49 | 0.008     | 0.958   | 49 | 0.170  | 0.242   | 49 | -0.265                 | 0.071   | 47 |
| ptau <sub>181</sub>                          | -0.009 | 0.951   | 49 | -0.022    | 0.881   | 49 | 0.162  | 0.266   | 49 | -0.261                 | 0.076   | 47 |
| A $\beta$ <sub>42</sub>                      | 0.107  | 0.463   | 49 | -0.122    | 0.403   | 49 | -0.102 | 0.484   | 49 | 0.034                  | 0.821   | 47 |
| A $\beta$ <sub>40</sub>                      | -0.038 | 0.803   | 46 | -0.070    | 0.646   | 46 | -0.081 | 0.592   | 46 | -0.207                 | 0.178   | 44 |
| tau/A $\beta$ <sub>42</sub>                  | -0.132 | 0.367   | 49 | 0.055     | 0.708   | 49 | 0.111  | 0.448   | 49 | -0.281                 | 0.056   | 47 |
| ptau <sub>181</sub> /A $\beta$ <sub>42</sub> | -0.084 | 0.564   | 49 | 0.033     | 0.820   | 49 | 0.118  | 0.421   | 49 | -0.270                 | 0.067   | 47 |

**Supplemental Table. Pearson correlation coefficients between the biomarker values and age, education, CDR-SB, and the psychometric factor score at baseline.**

Abbreviations: CDR-SB, Clinical Dementia Rating – Sum of Boxes.
